# Supplementary material for: Demographic Processes Linked to Genetic Diversity and Positive Selection across a Species' Range
Source: PubMed Central journal article supplement — Plant Commun. 2020 Sep 11;1(6):100111. doi: 10.1016/j.xplc.2020.100111 (PMC7747977; doi:10.1016/j.xplc.2020.100111), 2020-09-11
Supplement: mmc1.pdf [file mmc1.pdf]

**Plant Communications, Volume 1**

**Supplemental Information**

**Demographic Processes Linked to Genetic Diversity and Positive Selection across a Species' Range**

**Yvonne Willi, Marco Fracassetti, Olivier Bachmann, and Josh Van Buskirk**

Table S1. Population information with the columns (from left to right): population identity; latitude North [°]; longitude West [°]; log<sub>10</sub>-transformed population census size; mating system (O: outcrossing, S: selfing); membership in ancestral genetic cluster (E: east, W: west); geographic distance from the core (for a detailed description see Methods) [km]; evidence for admixture (1:yes, 0: no); the three genomic diversity estimates of Tajima's  $\pi$ , Watterson's  $\theta$  and Tajima's  $D$  for intergenic regions, intron regions and coding DNA sequences of the genome; the two genomic estimates of a signature of positive selection, fraction of genes with positive McDonald-Kreitman test and the fraction of substitutions driven to fixation by positive selection at non-synonymous sites,  $\alpha$ , based on aMK testing.

| Pop. | Lat.  | Long.  | IPS | MS | Clu. | Dist. | Admix. | Intergenic regions |          |         | Intron regions |          |        | CDS    |          |        | Positive selection       |          |
|------|-------|--------|-----|----|------|-------|--------|--------------------|----------|---------|----------------|----------|--------|--------|----------|--------|--------------------------|----------|
|      |       |        |     |    |      |       |        | $\pi$              | $\theta$ | $D$     | $\pi$          | $\theta$ | $D$    | $\pi$  | $\theta$ | $D$    | $F_{\text{genesposSel}}$ | $\alpha$ |
| NC1  | 35.25 | -83.08 | 2.3 | S  | E    | 868   | 0      | 0.0019             | 0.0018   | 0.3198  | 0.0004         | 0.0003   | 0.5953 | 0.0003 | 0.0003   | 0.6060 | 0.0015                   | -0.1867  |
| NC2  | 36.04 | -81.16 | 4.4 | O  | E    | 686   | 0      | 0.0021             | 0.0020   | 0.2488  | 0.0005         | 0.0004   | 0.5981 | 0.0004 | 0.0004   | 0.5966 | 0.0020                   | -0.1345  |
| NC3  | 36.11 | -81.66 | 3.2 | O  | E    | 710   | 0      | 0.0029             | 0.0026   | 0.3979  | 0.0008         | 0.0007   | 0.7371 | 0.0007 | 0.0005   | 0.7299 | 0.0011                   | -0.0913  |
| NC4  | 36.41 | -79.96 | 3.5 | O  | E    | 593   | 0      | 0.0028             | 0.0026   | 0.1305  | 0.0008         | 0.0007   | 0.4989 | 0.0007 | 0.0006   | 0.4660 | 0.0011                   | -0.0514  |
| VA1  | 37.42 | -77.02 | 2.8 | O  | E    | 404   | 0      | 0.0048             | 0.0049   | -0.0912 | 0.0017         | 0.0016   | 0.2643 | 0.0013 | 0.0012   | 0.2828 | 0.0028                   | 0.1805   |
| VA2  | 37.81 | -77.12 | 1.8 | S  | E    | 364   | 0      | 0.0031             | 0.0028   | 0.4347  | 0.0011         | 0.0009   | 0.7859 | 0.0008 | 0.0007   | 0.7723 | 0.0000                   | -0.0682  |
| MD1  | 38.86 | -75.84 | 2.6 | O  | E    | 289   | 0      | 0.0043             | 0.0039   | 0.4490  | 0.0016         | 0.0013   | 0.7746 | 0.0012 | 0.0010   | 0.7946 | 0.0028                   | 0.1042   |
| MD2  | 38.99 | -77.25 | 2.9 | O  | E    | 231   | 0      | 0.0055             | 0.0057   | -0.1222 | 0.0021         | 0.0019   | 0.3640 | 0.0016 | 0.0014   | 0.4048 | 0.0049                   | 0.1870   |
| MD3  | 39.49 | -78.93 | 2.1 | O  | E    | 290   | 0      | 0.0036             | 0.0034   | 0.2707  | 0.0013         | 0.0011   | 0.6666 | 0.0010 | 0.0008   | 0.6542 | 0.0019                   | 0.0185   |
| MD4  | 39.70 | -76.19 | 3.7 | O  | E    | 201   | 0      | 0.0059             | 0.0069   | -0.4831 | 0.0021         | 0.0021   | 0.0453 | 0.0016 | 0.0016   | 0.1004 | 0.0021                   | 0.1830   |
| WV1  | 38.96 | -79.29 | 3.0 | O  | E    | 342   | 0      | 0.0045             | 0.0043   | 0.1517  | 0.0016         | 0.0014   | 0.5286 | 0.0012 | 0.0011   | 0.4919 | 0.0021                   | 0.0058   |
| NJ1  | 40.44 | -73.99 | 2.1 | O  | E    | 172   | 0      | 0.0041             | 0.0038   | 0.3076  | 0.0016         | 0.0013   | 0.7891 | 0.0012 | 0.0010   | 0.8075 | 0.0015                   | 0.0715   |

|     |       |        |     |   |   |      |   |        |        |         |        |        |         |        |        |         |        |         |
|-----|-------|--------|-----|---|---|------|---|--------|--------|---------|--------|--------|---------|--------|--------|---------|--------|---------|
| PA1 | 40.51 | -80.36 | 2.1 | O | E | 402  | 0 | 0.0043 | 0.0043 | 0.0351  | 0.0017 | 0.0015 | 0.4048  | 0.0013 | 0.0012 | 0.3941  | 0.0015 | 0.0899  |
| PA2 | 40.57 | -75.40 | 3.9 | O | E | 250  | 0 | 0.0027 | 0.0025 | 0.3187  | 0.0007 | 0.0006 | 0.6489  | 0.0005 | 0.0005 | 0.6779  | 0.0014 | 0.0293  |
| PA3 | 41.28 | -77.87 | 3.0 | O | E | 230  | 0 | 0.0049 | 0.0053 | -0.2802 | 0.0020 | 0.0020 | 0.1459  | 0.0015 | 0.0015 | 0.1276  | 0.0014 | 0.2135  |
| NY1 | 41.30 | -73.98 | 2.6 | O | E | 193  | 0 | 0.0051 | 0.0056 | -0.3721 | 0.0021 | 0.0022 | 0.0278  | 0.0016 | 0.0016 | 0.0672  | 0.0006 | 0.2121  |
| NY2 | 41.32 | -73.99 | 2.3 | O | E | 194  | 0 | 0.0047 | 0.0046 | 0.1117  | 0.0018 | 0.0016 | 0.5512  | 0.0014 | 0.0012 | 0.5881  | 0.0031 | 0.1628  |
| NY3 | 41.73 | -73.56 | 5.6 | O | E | 240  | 0 | 0.0031 | 0.0029 | 0.3819  | 0.0012 | 0.0010 | 0.7617  | 0.0009 | 0.0008 | 0.7485  | 0.0026 | -0.0103 |
| NY4 | 42.35 | -76.39 | 3.2 | O | E | 274  | 0 | 0.0051 | 0.0053 | -0.1268 | 0.0018 | 0.0017 | 0.3775  | 0.0014 | 0.0013 | 0.3912  | 0.0020 | 0.1603  |
| NY5 | 42.66 | -74.02 | 2.2 | O | E | 401  | 0 | 0.0051 | 0.0053 | -0.1228 | 0.0019 | 0.0018 | 0.3426  | 0.0015 | 0.0013 | 0.3626  | 0.0030 | 0.1216  |
| NY6 | 43.00 | -76.09 | 2.8 | O | E | 348  | 0 | 0.0050 | 0.0053 | -0.2173 | 0.0020 | 0.0019 | 0.2466  | 0.0015 | 0.0014 | 0.2697  | 0.0028 | 0.1542  |
| MO1 | 37.72 | -92.06 | 3.3 | O | W | 893  | 0 | 0.0019 | 0.0018 | 0.2269  | 0.0005 | 0.0004 | 0.5056  | 0.0004 | 0.0004 | 0.5015  | 0.0015 | -0.0713 |
| MO2 | 38.47 | -90.71 | 2.1 | S | W | 791  | 0 | 0.0005 | 0.0005 | 0.2205  | 0.0000 | 0.0000 | 0.4514  | 0.0000 | 0.0000 | 0.5549  | 0.0000 | -0.1864 |
| MO3 | 39.59 | -91.92 | 3.6 | O | W | 690  | 1 | 0.0033 | 0.0032 | 0.1386  | 0.0013 | 0.0012 | 0.4043  | 0.0009 | 0.0009 | 0.4022  | 0.0000 | 0.1756  |
| IL1 | 41.00 | -87.56 | 1.9 | O | W | 872  | 0 | 0.0019 | 0.0018 | 0.3313  | 0.0006 | 0.0005 | 0.7753  | 0.0005 | 0.0004 | 0.7731  | 0.0000 | -0.1634 |
| IL2 | 42.42 | -87.80 | 6.8 | O | W | 604  | 0 | 0.0037 | 0.0037 | 0.0313  | 0.0014 | 0.0013 | 0.4980  | 0.0011 | 0.0010 | 0.5097  | 0.0004 | 0.0755  |
| IN1 | 41.61 | -87.19 | 5.2 | O | W | 761  | 0 | 0.0034 | 0.0036 | -0.1801 | 0.0014 | 0.0013 | 0.2700  | 0.0010 | 0.0010 | 0.2702  | 0.0012 | 0.0193  |
| OH1 | 41.62 | -83.79 | 4.2 | S | W | 819  | 0 | 0.0007 | 0.0008 | 0.1723  | 0.0000 | 0.0000 | 0.7956  | 0.0000 | 0.0000 | 0.8222  | 0.0000 | -0.1218 |
| IA1 | 41.97 | -90.37 | 2.2 | O | W | 402  | 1 | 0.0040 | 0.0039 | 0.2051  | 0.0016 | 0.0015 | 0.4739  | 0.0012 | 0.0011 | 0.4776  | 0.0036 | 0.1077  |
| IA2 | 43.36 | -91.84 | 2.0 | O | W | 304  | 1 | 0.0036 | 0.0034 | 0.3213  | 0.0013 | 0.0011 | 0.6918  | 0.0010 | 0.0008 | 0.7058  | 0.0025 | 0.0754  |
| PA4 | 42.17 | -80.07 | 5.5 | O | W | 1040 | 1 | 0.0029 | 0.0026 | 0.3684  | 0.0010 | 0.0008 | 0.7836  | 0.0007 | 0.0006 | 0.7970  | 0.0024 | -0.0340 |
| MI1 | 42.70 | -86.20 | 5.2 | O | W | 618  | 0 | 0.0033 | 0.0035 | -0.1618 | 0.0013 | 0.0013 | 0.2302  | 0.0010 | 0.0010 | 0.2208  | 0.0005 | 0.0405  |
| MI2 | 44.01 | -86.49 | 7.0 | O | W | 499  | 0 | 0.0034 | 0.0035 | -0.1023 | 0.0013 | 0.0012 | 0.3655  | 0.0010 | 0.0009 | 0.3857  | 0.0005 | 0.0350  |
| MI3 | 45.75 | -85.50 | 4.6 | O | W | 480  | 0 | 0.0033 | 0.0034 | -0.0694 | 0.0013 | 0.0012 | 0.3692  | 0.0010 | 0.0009 | 0.3512  | 0.0020 | 0.0649  |
| MI4 | 46.67 | -86.02 | 2.8 | O | W | 624  | 0 | 0.0022 | 0.0022 | 0.0906  | 0.0007 | 0.0006 | 0.5842  | 0.0006 | 0.0005 | 0.5858  | 0.0007 | -0.1216 |
| MI5 | 47.38 | -87.96 | 3.1 | S | W | 238  | 0 | 0.0020 | 0.0019 | 0.2573  | 0.0007 | 0.0006 | 0.7669  | 0.0005 | 0.0004 | 0.7834  | 0.0000 | -0.0839 |
| MI6 | 48.16 | -88.45 | 3.0 | S | W | 331  | 0 | 0.0015 | 0.0016 | 0.0462  | 0.0003 | 0.0003 | 0.4148  | 0.0002 | 0.0002 | 0.4250  | 0.0000 | -0.1667 |
| WI1 | 43.83 | -89.72 | 3.3 | O | W | 213  | 0 | 0.0048 | 0.0061 | -0.8135 | 0.0020 | 0.0024 | -0.4234 | 0.0016 | 0.0018 | -0.3599 | 0.0038 | 0.2058  |
| WI2 | 46.11 | -92.08 | 1.7 | O | W | 218  | 0 | 0.0041 | 0.0044 | -0.2143 | 0.0017 | 0.0016 | 0.1503  | 0.0013 | 0.0013 | 0.1888  | 0.0014 | 0.1205  |
| WI3 | 46.73 | -90.81 | 3.8 | O | W | 196  | 0 | 0.0037 | 0.0036 | 0.1003  | 0.0015 | 0.0013 | 0.5002  | 0.0011 | 0.0010 | 0.5214  | 0.0027 | 0.1579  |
| ON1 | 42.87 | -79.18 | 1.8 | S | W | 1105 | 1 | 0.0013 | 0.0013 | 0.3233  | 0.0001 | 0.0001 | 0.6676  | 0.0001 | 0.0001 | 0.6879  | 0.0010 | -0.1307 |
| ON2 | 42.58 | -80.39 | 3.5 | S | W | 997  | 1 | 0.0010 | 0.0011 | -0.3272 | 0.0001 | 0.0001 | -0.4252 | 0.0001 | 0.0001 | -0.4264 | 0.0021 | -0.1797 |

|                          |       |        |     |   |   |     |   |               |               |               |               |               |               |               |               |               |               |                |
|--------------------------|-------|--------|-----|---|---|-----|---|---------------|---------------|---------------|---------------|---------------|---------------|---------------|---------------|---------------|---------------|----------------|
| ON3                      | 43.26 | -81.84 | 5.9 | O | W | 872 | 0 | 0.0028        | 0.0028        | -0.0354       | 0.0009        | 0.0008        | 0.3158        | 0.0007        | 0.0006        | 0.3286        | 0.0023        | -0.0535        |
| ON4                      | 42.26 | -81.85 | 6.3 | S | W | 936 | 1 | 0.0014        | 0.0014        | 0.1265        | 0.0003        | 0.0003        | 0.5654        | 0.0002        | 0.0002        | 0.5577        | 0.0047        | 0.0078         |
| ON5                      | 45.60 | -82.14 | 4.1 | O | W | 699 | 0 | 0.0030        | 0.0028        | 0.2785        | 0.0010        | 0.0008        | 0.7956        | 0.0008        | 0.0006        | 0.7891        | 0.0014        | 0.1435         |
| ON6                      | 45.79 | -82.75 | 2.2 | O | W | 662 | 0 | 0.0027        | 0.0027        | 0.0092        | 0.0009        | 0.0009        | 0.3959        | 0.0007        | 0.0006        | 0.3999        | 0.0011        | -0.0467        |
| ON7                      | 45.78 | -82.75 | 2.1 | O | W | 662 | 0 | 0.0024        | 0.0024        | 0.0875        | 0.0008        | 0.0007        | 0.6258        | 0.0006        | 0.0006        | 0.6461        | 0.0007        | -0.0344        |
| ON8                      | 47.93 | -84.85 | 2.9 | O | W | 479 | 0 | 0.0028        | 0.0025        | 0.3553        | 0.0009        | 0.0008        | 0.8746        | 0.0007        | 0.0006        | 0.8800        | 0.0021        | -0.0517        |
| ON9                      | 47.79 | -84.90 | 2.7 | O | W | 467 | 0 | 0.0029        | 0.0026        | 0.3906        | 0.0010        | 0.0008        | 0.8207        | 0.0007        | 0.0006        | 0.8323        | 0.0012        | -0.0643        |
| ON10                     | 48.60 | -86.30 | 4.7 | O | W | 486 | 0 | 0.0028        | 0.0026        | 0.2655        | 0.0010        | 0.0008        | 0.7345        | 0.0008        | 0.0006        | 0.7428        | 0.0006        | 0.0158         |
| ON11                     | 48.77 | -87.13 | 1.5 | S | W | 417 | 0 | 0.0003        | 0.0003        | -0.0851       | 0.0000        | 0.0000        | -0.2173       | 0.0000        | 0.0000        | -0.2141       | 0.0000        | 0.1146         |
| ON12                     | 49.65 | -94.92 | 3.1 | O | W | 691 | 0 | 0.0029        | 0.0029        | 0.0589        | 0.0011        | 0.0010        | 0.5815        | 0.0009        | 0.0007        | 0.5801        | 0.0005        | -0.0727        |
| -----                    |       |        |     |   |   |     |   |               |               |               |               |               |               |               |               |               |               |                |
| <i>Outcrossing, mean</i> |       |        |     |   |   |     |   | <i>0.0036</i> | <i>0.0036</i> | <i>0.0636</i> | <i>0.0013</i> | <i>0.0012</i> | <i>0.4785</i> | <i>0.0010</i> | <i>0.0009</i> | <i>0.4878</i> | <i>0.0018</i> | <i>0.0507</i>  |
| <i>Selfing, mean</i>     |       |        |     |   |   |     |   | <i>0.0014</i> | <i>0.0013</i> | <i>0.1488</i> | <i>0.0003</i> | <i>0.0003</i> | <i>0.4401</i> | <i>0.0002</i> | <i>0.0002</i> | <i>0.4569</i> | <i>0.0009</i> | <i>-0.1002</i> |
| <i>Average</i>           |       |        |     |   |   |     |   | <i>0.0032</i> | <i>0.0032</i> | <i>0.0800</i> | <i>0.0011</i> | <i>0.0010</i> | <i>0.4711</i> | <i>0.0009</i> | <i>0.0008</i> | <i>0.4818</i> | <i>0.0016</i> | <i>0.0217</i>  |
| -----                    |       |        |     |   |   |     |   |               |               |               |               |               |               |               |               |               |               |                |

Table S2. Test statistics of the four-population test for treeness. Clade 1 was [NJ1,PA1], clade 2 was[ON3,X], where X is a western population in an area formerly covered by the Laurentide ice sheet. Tests are sorted by the Z score; only tests with significant positive Z scores support the hypothesis of past gene flow.

| Populations      | F4 statistic | Standard error | Z score | P        |
|------------------|--------------|----------------|---------|----------|
| NJ1,PA1;ON3,PA4  | 0.00875      | 0.00134        | 6.54    | 6.25E-11 |
| NJ1,PA1;ON3,ON2  | 0.00663      | 0.00140        | 4.74    | 2.14E-6  |
| NJ1,PA1;ON3,ON1  | 0.00659      | 0.00140        | 4.72    | 2.35E-6  |
| NJ1,PA1;ON3,ON4  | 0.00437      | 0.00116        | 3.78    | 0.000155 |
| NJ1,PA1;ON3,IL1  | 0.00100      | 0.00098        | 1.02    | 0.307    |
| NJ1,PA1;ON3,OH1  | 0.000809     | 0.00101        | 0.804   | 0.421    |
| NJ1,PA1;ON3,WI2  | 0.000174     | 0.000921       | 0.189   | 0.850    |
| NJ1,PA1;ON3,IL2  | -0.000261    | 0.00113        | -0.231  | 0.817    |
| NJ1,PA1;ON3,IN1  | -0.000355    | 0.000832       | -0.427  | 0.669    |
| NJ1,PA1;ON3,MI2  | -0.000431    | 0.000847       | -0.509  | 0.611    |
| NJ1,PA1;ON3,MI1  | -0.000577    | 0.000878       | -0.657  | 0.511    |
| NJ1,PA1;ON3,WI3  | -0.000988    | 0.00101        | -0.983  | 0.326    |
| NJ1,PA1;ON3,MI3  | -0.00108     | 0.000878       | -1.23   | 0.220    |
| NJ1,PA1;ON3,ON5  | -0.00186     | 0.000937       | -1.99   | 0.0471   |
| NJ1,PA1;ON3,ON8  | -0.00227     | 0.00113        | -2.02   | 0.0436   |
| NJ1,PA1;ON3,MI5  | -0.00236     | 0.00114        | -2.07   | 0.0387   |
| NJ1,PA1;ON3,ON7  | -0.00230     | 0.00110        | -2.09   | 0.0368   |
| NJ1,PA1;ON3,ON12 | -0.00238     | 0.000985       | -2.42   | 0.0157   |
| NJ1,PA1;ON3,ON6  | -0.00258     | 0.00101        | -2.57   | 0.0102   |
| NJ1,PA1;ON3,MI4  | -0.00249     | 0.000947       | -2.63   | 0.00858  |
| NJ1,PA1;ON3,ON9  | -0.00345     | 0.00102        | -3.38   | 0.000734 |
| NJ1,PA1;ON3,MI6  | -0.00542     | 0.00143        | -3.79   | 0.000149 |
| NJ1,PA1;ON3,ON10 | -0.00378     | 0.000928       | -4.07   | 4.73E-5  |
| NJ1,PA1;ON3,ON11 | -0.00607     | 0.00140        | -4.35   | 1.39E-5  |

Table S3. Test statistics of the four-population test for treeness. Clade 1 was [MO1,MO2], clade 2 was [WI3,X], where X is a western population. Tests are sorted by the Z score; only tests with significant positive Z scores support the hypothesis of past gene flow.

---

| Populations      | F4 statistic | Standard error | Z score | P         |
|------------------|--------------|----------------|---------|-----------|
| MO2,MO1;WI3,MO3  | 0.00603      | 0.00175        | 3.44    | 0.000577  |
| MO2,MO1;WI3,IA1  | 0.00294      | 0.00133        | 2.21    | 2.71E-2   |
| MO2,MO1;WI3,IA2  | 0.00313      | 0.00149        | 2.10    | 3.54E-2   |
| MO2,MO1;WI3,PA4  | 0.00112      | 0.00156        | 0.716   | 0.474     |
| MO2,MO1;WI3,WI2  | 0.000541     | 0.000957       | 0.565   | 0.572     |
| MO2,MO1;WI3,MI5  | -0.000397    | 0.00133        | -0.298  | 0.766     |
| MO2,MO1;WI3,WI1  | -0.000556    | 0.000944       | -0.589  | 0.556     |
| MO2,MO1;WI3,ON2  | -0.00107     | 0.00166        | -0.644  | 0.519     |
| MO2,MO1;WI3,ON1  | -0.00143     | 0.00168        | -0.853  | 0.394     |
| MO2,MO1;WI3,ON12 | -0.00277     | 0.00143        | -1.94   | 0.0526    |
| MO2,MO1;WI3,ON4  | -0.00379     | 0.00153        | -2.47   | 0.0134    |
| MO2,MO1;WI3,ON8  | -0.00439     | 0.00127        | -3.45   | 0.000565  |
| MO2,MO1;WI3,ON10 | -0.00441     | 0.00120        | -3.69   | 0.000224  |
| MO2,MO1;WI3,ON9  | -0.00477     | 0.00126        | -3.79   | 1.53E-4   |
| MO2,MO1;WI3,ON11 | -0.00623     | 0.00157        | -3.97   | 7.30E-5   |
| MO2,MO1;WI3,MI3  | -0.00528     | 0.00129        | -4.08   | 4.53E-5   |
| MO2,MO1;WI3,MI6  | -0.00601     | 0.00142        | -4.22   | 2.41E-5   |
| MO2,MO1;WI3,MI4  | -0.00737     | 0.00142        | -5.19   | 2.05E-7   |
| MO2,MO1;WI3,IL2  | -0.00621     | 0.00114        | -5.45   | 5.01E-8   |
| MO2,MO1;WI3,ON5  | -0.00741     | 0.00128        | -5.77   | 8.08E-009 |
| MO2,MO1;WI3,ON7  | -0.00894     | 0.0015         | -5.97   | 2.39E-009 |
| MO2,MO1;WI3,ON6  | -0.00829     | 0.00139        | -5.98   | 2.20E-009 |
| MO2,MO1;WI3,MI2  | -0.00837     | 0.00116        | -7.22   | 5.14E-013 |
| MO2,MO1;WI3,IN1  | -0.00892     | 0.00119        | -7.50   | 6.36E-014 |
| MO2,MO1;WI3,OH1  | -0.0130      | 0.00173        | -7.51   | 6.01E-014 |
| MO2,MO1;WI3,ON3  | -0.0104      | 0.00135        | -7.73   | 1.09E-014 |
| MO2,MO1;WI3,IL1  | -0.0106      | 0.00131        | -8.11   | 5.14E-016 |
| MO2,MO1;WI3,MI1  | -0.00988     | 0.00116        | -8.50   | 1.84E-017 |

---

Table S4. Linear model testing relationships between genomic diversity and census size, mating system, ancestral cluster, distance to cluster core, and admixture. Genomic diversity is represented by the weighted medians of Tajima's  $D$  of intergenic and CDS regions (windows of 5000 bp). Sample size for all models was 52 populations. Variation explained by the models were: intergenic  $D$ :  $R^2 = 0.13$ ; CDS  $D$ :  $R^2 = 0.04$ . Estimated intercept and coefficients, and variation explained are reported. Significance is indicated: \*,  $0.01 < P \leq 0.05$ ; \*\*,  $0.001 < P \leq 0.01$ ; \*\*\*,  $P \leq 0.001$ .

| Source                               | $D$ , intergenic regions |          | $D$ , CDS regions |          |
|--------------------------------------|--------------------------|----------|-------------------|----------|
|                                      | Estimate                 | Var. [%] | Estimate          | Var. [%] |
| Intercept                            | 0.1248                   |          | 0.5357***         |          |
| $\log_{10}(\text{census size})$      | -0.0296                  | 1.65     | -0.0122           | 0.13     |
| Mating system (selfing)              | 0.0175                   | 0.78     | -0.0623           | 0.40     |
| Ancestral cluster (west)             | -0.0920                  | 1.22     | -0.0583           | 0.47     |
| $\log_{10}(\text{distance to core})$ | 0.4047*                  | 8.06     | 0.3117            | 3.20     |
| Admixture (yes)                      | 0.0498                   | 0.95     | -0.0531           | 0.27     |

Table S5. Observed Watterson's  $\theta$  from intergenic regions for pairs of selfing (S) and nearby outcrossing (O) populations were compared to test whether differences in  $N_e$  of selfing populations exceeded the predicted reduction relative to a random outcrossing population. The predicted reduction is  $(1 + F_{IS}$  of the selfing population) (Pollack 1987). The last column lists the relative deviation of the observed  $\theta$  in selfing populations from their expected  $\theta$  based on the  $\theta$  of the nearby outcrossing populations.

---

| Population S   | $F_{IS}$ | $\theta_{S \text{ obs}}$ | Population O | $\theta_{O \text{ obs}}$ | $\theta_{S \text{ predicted}}$ | Deviation $_{S \text{ obs}}$ |
|----------------|----------|--------------------------|--------------|--------------------------|--------------------------------|------------------------------|
| MI6            | 0.673    | 0.0016                   | ON12         | 0.0029                   | 0.0017                         | -0.10                        |
| MO2            | 0.677    | 0.0005                   | MO1          | 0.0018                   | 0.0011                         | -0.50                        |
| NC1            | 0.442    | 0.0018                   | NC2          | 0.0020                   | 0.0014                         | 0.29                         |
| OH1            | 0.680    | 0.0008                   | IL1          | 0.0018                   | 0.0011                         | -0.28                        |
| ON1            | 0.700    | 0.0013                   | PA4          | 0.0026                   | 0.0015                         | -0.18                        |
| ON11           | 0.950    | 0.0003                   | ON10         | 0.0026                   | 0.0014                         | -0.74                        |
| ON2            | 0.615    | 0.0011                   | PA4          | 0.0026                   | 0.0016                         | -0.31                        |
| ON4            | 0.458    | 0.0014                   | ON3          | 0.0028                   | 0.0019                         | -0.26                        |
| <i>Average</i> |          |                          |              |                          |                                | -0.26                        |

---



Table S6. Pearson correlation coefficients for pairs of genetic diversity estimates based on microsatellites (expected heterozygosity,  $H_e$ , and allelic richness,  $A$ ) and on single-nucleotide polymorphisms for intergenic regions, intron regions, and coding DNA sequences (CDS) (Tajima's  $\pi$ , and Watterson's  $\theta$ ). Sample size was 52 populations.  $P$ -values were  $<0.001$  for all pairwise tests.

---

|                       | $\pi$ , intergen. | $\pi$ , intron | $\pi$ , CDS | $A$   | $\theta$ , intergen. | $\theta$ , intron | $\theta$ , CDS |
|-----------------------|-------------------|----------------|-------------|-------|----------------------|-------------------|----------------|
| $H_e$                 | 0.892             | 0.925          | 0.924       | 0.919 | 0.894                | 0.919             | 0.919          |
| $\pi$ , intergenic    |                   | 0.983          | 0.984       | 0.850 | 0.981                | 0.964             | 0.966          |
| $\pi$ , intron        |                   |                | 0.999       | 0.879 | 0.972                | 0.987             | 0.986          |
| $\pi$ , CDS           |                   |                |             | 0.877 | 0.973                | 0.985             | 0.987          |
| $A$                   |                   |                |             |       | 0.907                | 0.921             | 0.921          |
| $\theta$ , intergenic |                   |                |             |       |                      | 0.983             | 0.984          |
| $\theta$ , intron     |                   |                |             |       |                      |                   | 0.999          |

---

Figure S1

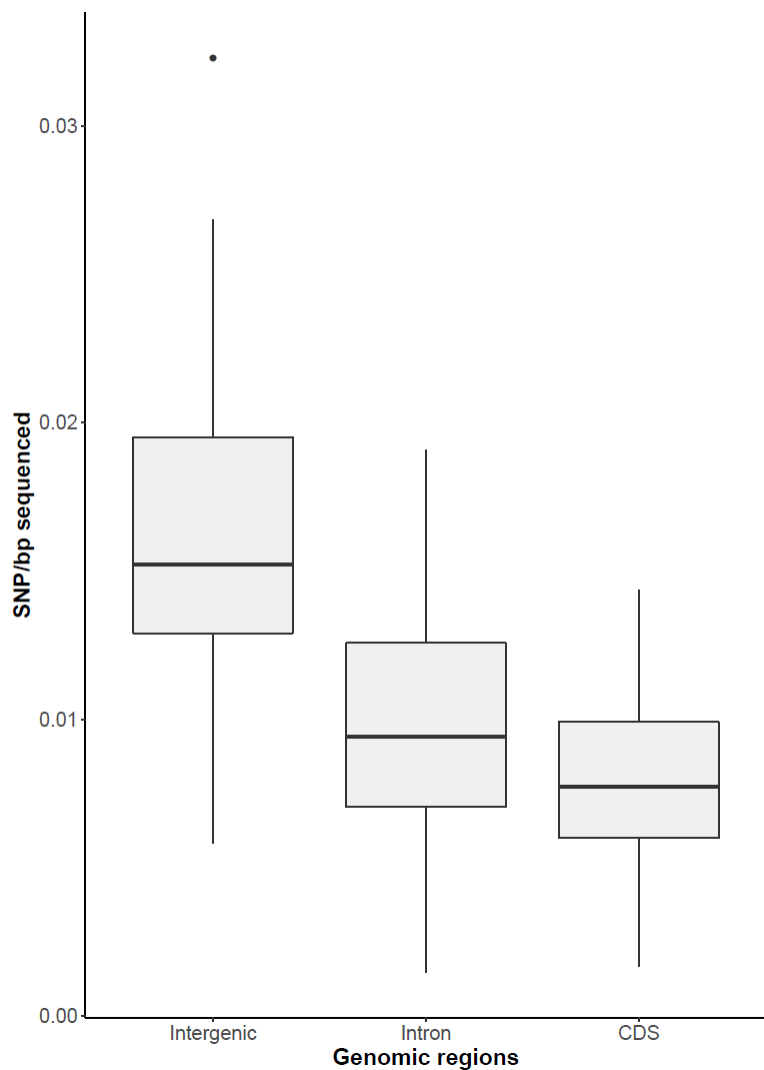

Fig. S1. Boxplot of the fraction of SNPs relative to base pairs sequenced for intergenic regions, intron regions and coding DNA sequences (CDS) ( $N = 52$  populations). The thick horizontal line represents the median, the hinges are the first and third quartile, and whiskers extend to the most extreme data point no more than 1.5x the interquartile range from the box.

Figure S2

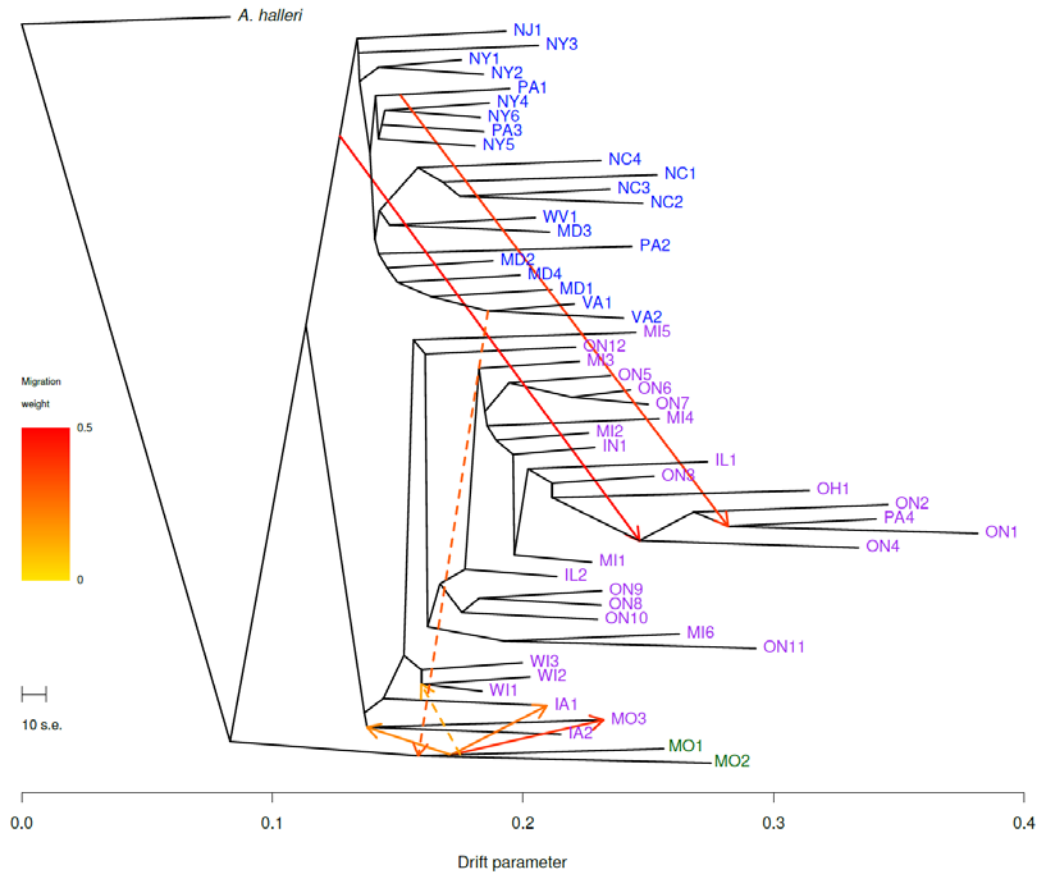

Fig. S2. Relatedness tree of *A. lyrata* populations, using *A. halleri* as an outgroup. The branch lengths are proportional to the drift parameter of time over  $2N_e$ . The populations of the Ozarks clade are indicated by green tip labels, those of the mid-western clade are in purple and those of the eastern clade in blue. The solid arrows indicate migration events with support by the four-population test for treeness, the dotted arrows indicate migration events without support by the four-population test or that could not be tested.

Figure S3

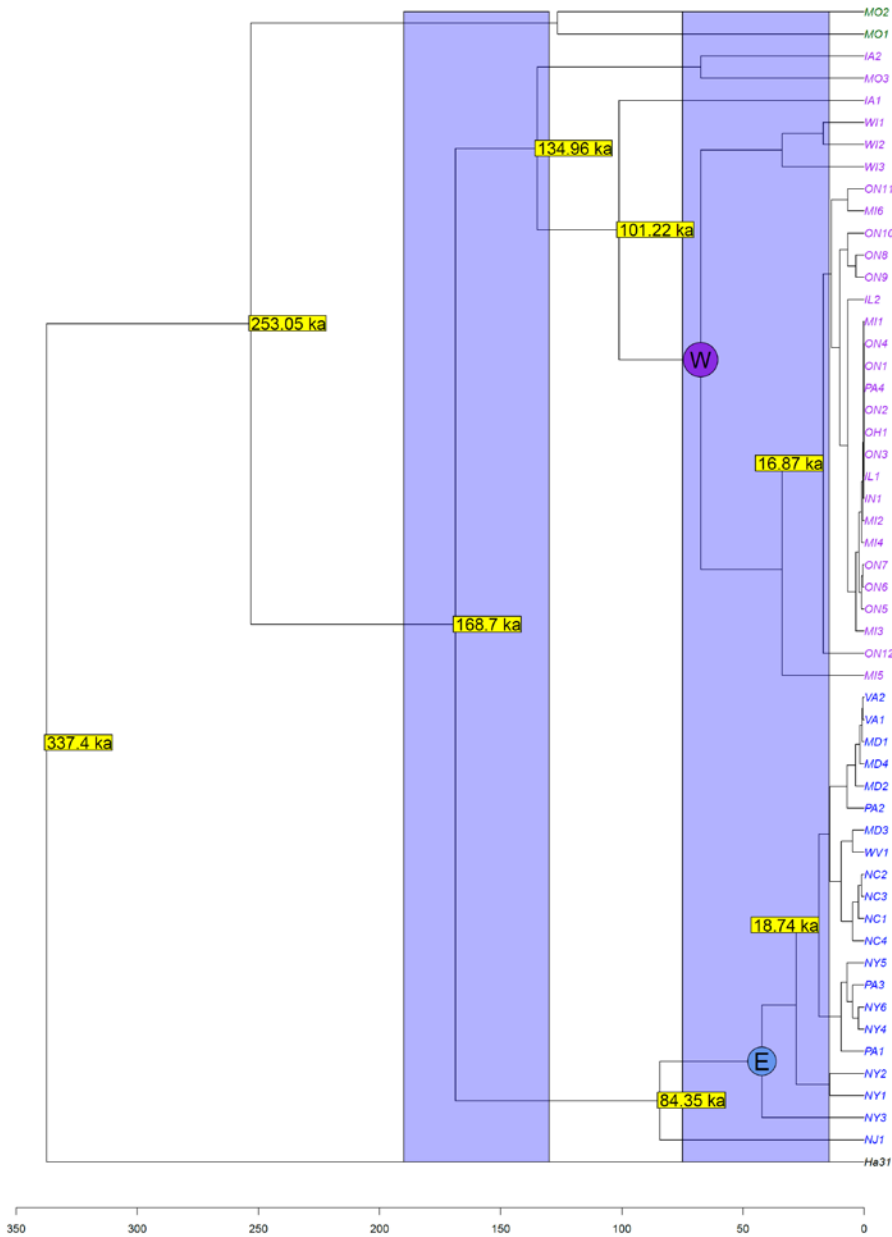

Fig. S3. Time-calibrated tree of *Arabidopsis lyrata* populations produced with Treemix. The purple rectangles indicate periods of glaciation (Illinoian 190,000-130,000 years ago; Wisconsin 75,000-14,500 years ago). The populations of the Ozarks clade are indicated by green tip labels, those of the mid-western clade are in purple, and those of the eastern clade are in blue. The two circles indicate the nodes from which expansion was assumed to have happened since the last glacial maximum. Populations with older splits were located in areas not covered by ice during the LGM. Estimated divergence times are in yellow boxes. The scale on the bottom indicates number of years ( $\times 10^3$ ) before present.

Figure S4

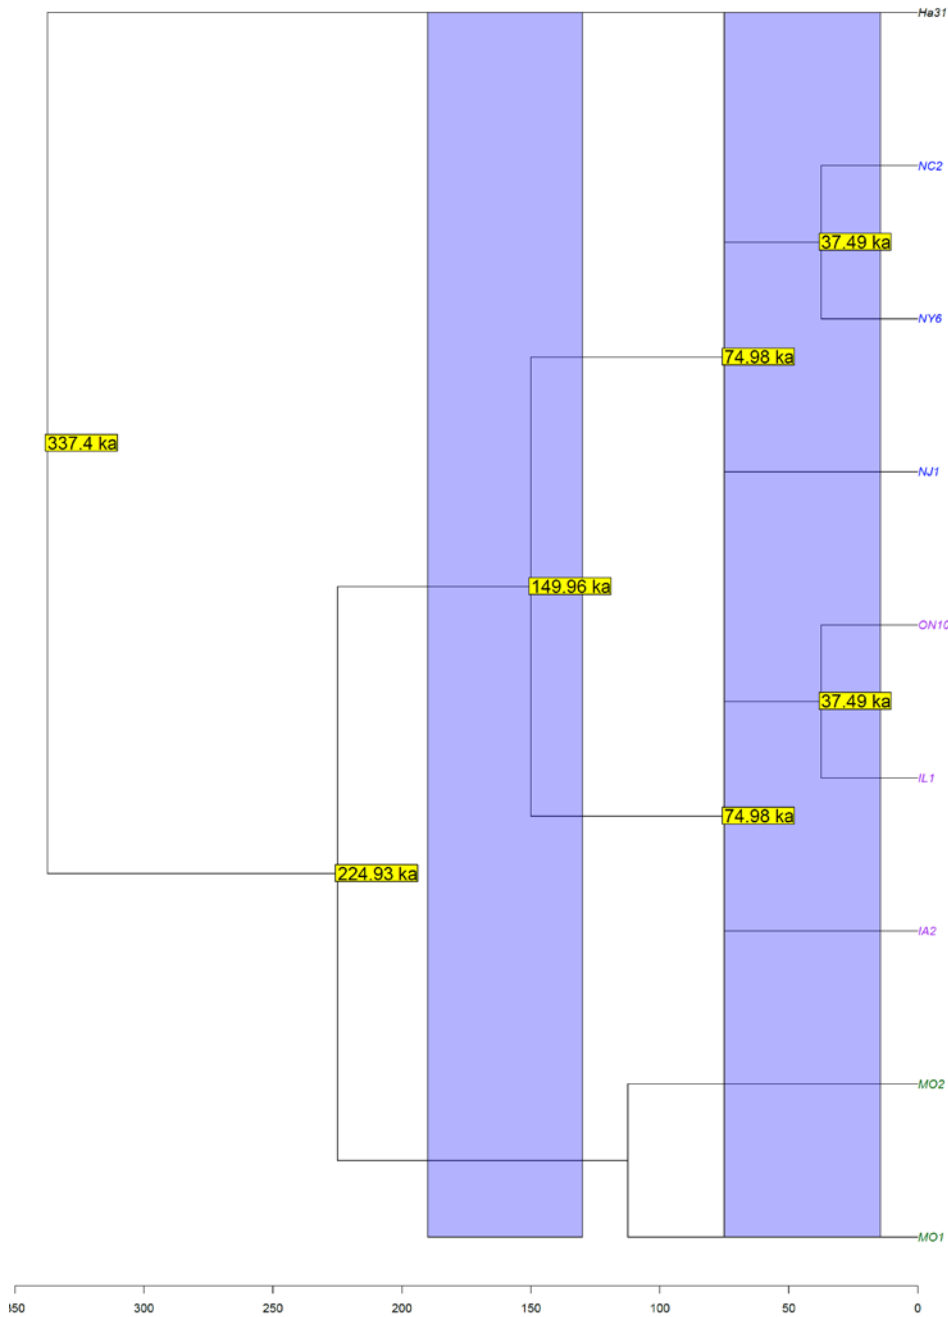

Fig. S4. Time-calibrated tree of a subsample of *A. lyrata* populations produced with revPoMo. The purple rectangles indicate periods of glaciation (Illinoian 190,000-130,000 years ago; Wisconsin 75,000-14,500 years ago). The populations of the Ozarks clade are indicated by green tip labels, those of the mid-western clade are in purple, and those of the eastern clade are in blue. Estimated divergence times are in yellow boxes. The scale on the bottom indicates number of years ( $\times 10^3$ ) before present.
